# Supplementary material for: Characterization and Pathogenicity of Flavobacterium psychrophilum Isolated from Rainbow Trout (Oncorhynchus mykiss) in Korea
Source: MDPI journal article supplement (doi:10.3390/microorganisms11102546), 2023-10-12
Supplement: s1 [file s1]

Supplementary Table S1. Enzymes activities produced by *F.psychrophilum* and comparison among the other strains.

| Enzyme                  | Isolates of<br>Finland(N=37)<br><br>(Madetoja et<br>al, 2001) | Isolates of<br>Sweden(N=8)<br><br>(Madetoja et<br>al, 2001) | Isolates of<br>Estonia(N=3)<br><br>(Madetoja et<br>al, 2001) | Isolates of<br>Turkey(N=20)<br><br>(Kum et al,<br>2008) | Isolates of<br>Canada(N=42)<br><br>(Hesami et al,<br>2010) | Isolates of<br>Danish (N=15)<br><br>(Christiansen<br>et al, 2016) | FPRT1 |
|-------------------------|---------------------------------------------------------------|-------------------------------------------------------------|--------------------------------------------------------------|---------------------------------------------------------|------------------------------------------------------------|-------------------------------------------------------------------|-------|
| Alkaline<br>phosphatase | +                                                             | +                                                           | +                                                            | +                                                       | +                                                          | +                                                                 | +     |
| Esterase (C4)           | +                                                             | +                                                           | +                                                            | -                                                       | -                                                          | +                                                                 | +     |
| Esterase lipase<br>(C8) | +                                                             | +                                                           | +                                                            | +                                                       | +                                                          | +                                                                 | +     |
| Lipase (C14)            | +                                                             | +                                                           | +                                                            | -                                                       | -                                                          | -                                                                 | -     |
| Leucine<br>arylamidase  | +                                                             | +                                                           | +                                                            | +                                                       | +                                                          | +                                                                 | +     |
| Valine<br>arylamidase   | +                                                             | +                                                           | +                                                            | +                                                       | +                                                          | +                                                                 | +     |
| Cystine<br>arylamidase  | variable                                                      | +                                                           | +                                                            | -                                                       | +                                                          | -                                                                 | -     |

|                                    |          |   |   |   |   |   |   |
|------------------------------------|----------|---|---|---|---|---|---|
| Trypsin                            | variable | + | + | - | + | - | - |
| a-Chymotrypsin                     | -        | - | - | - | - | - | - |
| Acid phosphatase                   | +        | + | + | + | + | + | + |
| Naphtol-AS-BI-phospho-hydrolase    | +        | + | + | + | + | + | + |
| $\alpha$ -Galactosidase            | -        | - | - | - | - | - | - |
| $\beta$ -Galactosidase             | -        | - | - | - | - | - | - |
| $\beta$ -glucuronidase             | -        | - | - | - | - | - | - |
| $\alpha$ -Glucosidase              | -        | - | - | - | - | - | - |
| $\beta$ -Glucosidase               | -        | - | - | - | - | - | - |
| N-Acetyl- $\beta$ -glucosaminidase | -        | - | - | - | - | - | - |
| $\alpha$ -mannosidase              | -        | - | - | - | - | - | - |

|                      |   |   |   |   |   |   |   |
|----------------------|---|---|---|---|---|---|---|
| $\alpha$ -fucosidase | - | - | - | - | - | - | - |
|----------------------|---|---|---|---|---|---|---|

In this result means += positive, - = negative.
